# Supplementary material for: Associations of moderate-to-vigorous-intensity physical activity and body mass index with glycated haemoglobin within the general population: a cross-sectional analysis of the 2008 Health Survey for England
Source: PubMed Central journal article supplement — BMJ Open. 2017 Apr 3;7(4):e014456. doi: 10.1136/bmjopen-2016-014456 (PMC5387972; doi:10.1136/bmjopen-2016-014456), 2017-04-03
Supplement: bmjopen-2016-014456supp.pdf [file bmjopen-2016-014456supp.pdf]

## **SUPPLEMENTARY MATERIALS**

# **Associations of moderate-to-vigorous-intensity physical activity and body mass index with glycated haemoglobin within the general population: a cross-sectional analysis of the 2008 Health Survey for England**

**Authors:** Kishan Bakrania\*, Thomas Yates\*, Charlotte L. Edwardson, Danielle H. Bodicoat, Dale W. Esliger, Jason M.R. Gill, Aadil Kazi <sup>2,3</sup>, Latha Velayudhan, Alan J. Sinclair, Naveed Sattar, Stuart J.H. Biddle, Mark Hamer, Melanie J. Davies and Kamlesh Khunti

\* = joint first authors

**Corresponding author:** Dr. Charlotte L. Edwardson, Diabetes Research Centre, University of Leicester, Leicester General Hospital, Gwendolen Road, Leicester, Leicestershire, LE5 4PW, United Kingdom. Phone: +44(0)116 258 8577. Email: [ce95@le.ac.uk](mailto:ce95@le.ac.uk).

**Number of supplementary figures: 1**

*Figure S1 - Flow chart of study participants*

**Number of supplementary tables: 6**

*Table S1 - Confounder analysis based on the criteria of changing the regression coefficient for either total accumulated moderate-to-vigorous-intensity physical activity (MVPA) time or body mass index (BMI) by 10% or more once added individually to a basic model adjusted for age, ethnicity, sex and accelerometer wear-time*

*Table S2 - Sample of adults with valid accelerometer data: comparison of the basic characteristics between the included and excluded participants*

*Table S3 - Sensitivity analyses: adjusted linear regression models showing the associations between continuous measures of total accumulated moderate-to-vigorous-intensity physical activity (MVPA) time and waist circumference with glycated haemoglobin (HbA1c)*

*Table S4 - Sensitivity analyses: interaction analysis: adjusted linear regression models showing the associations between continuous measures of total accumulated moderate-to-vigorous-intensity physical activity (MVPA) time and waist circumference with glycated haemoglobin (HbA1c) stratified by MVPA and waist circumference levels*

*Table S5 - Sensitivity analyses: weighted mutually exclusive category prevalence*

*Table S6 - Sensitivity analyses: adjusted linear regression models showing the associations between mutually exclusive categories of moderate-to-vigorous-intensity physical activity (MVPA) time and obesity status with glycated haemoglobin (HbA1c)*

Figure S1 - Flow chart of study participants

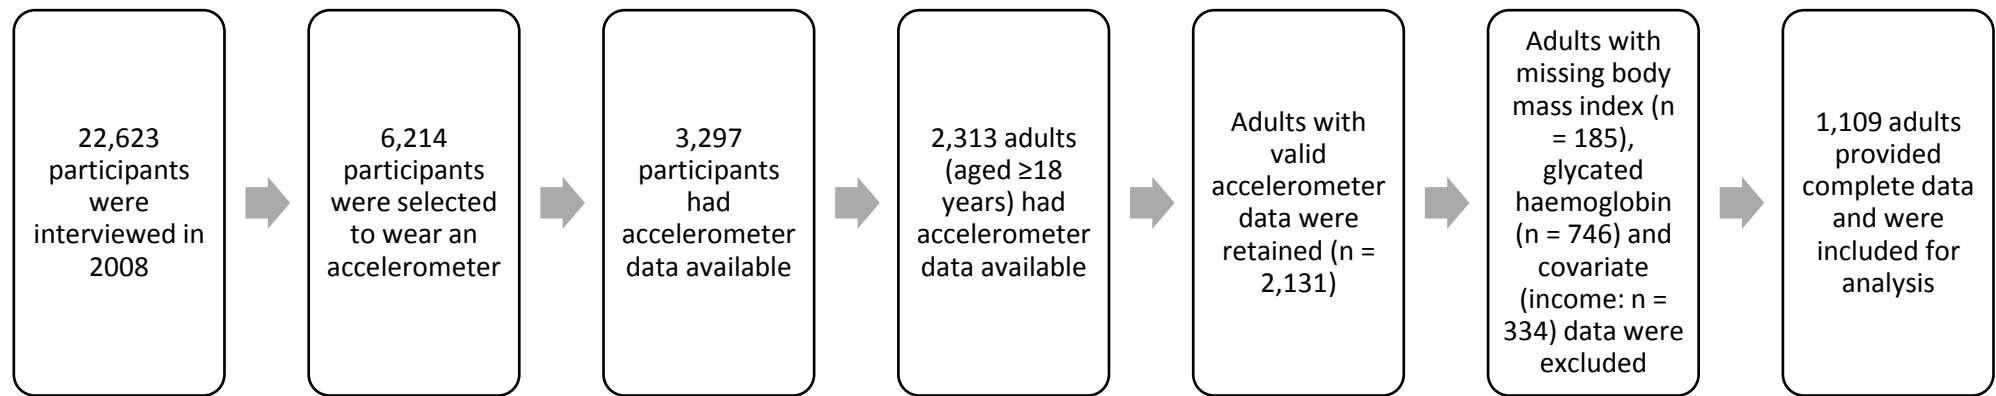

Table S1 - Confounder analysis based on a criteria of changing the regression coefficient for either total accumulated moderate-to-vigorous-intensity physical activity (MVPA) time or body mass index (BMI) by 10% or more once added individually to a basic model adjusted for age, ethnicity, sex and accelerometer wear-time

|                                                                                               | MVPA (30 minutes/day):<br>Beta †   | % Change in MVPA<br>Beta | BMI (1 kg/m <sup>2</sup> ):<br>Beta ‡ | % Change in BMI<br>Beta |
|-----------------------------------------------------------------------------------------------|------------------------------------|--------------------------|---------------------------------------|-------------------------|
| HbA1c [mmol/mol]<br>(dual units) [%]                                                          | -1.08619<br>-0.09939               | -                        | 0.27118<br>0.02481                    | -                       |
| Covariate individually added to basic model (age, sex, ethnicity and accelerometer wear-time) |                                    |                          |                                       |                         |
| Disease index                                                                                 | -1.00775<br>-0.09221               | 7.2                      | 0.26435<br>0.02419                    | -2.5                    |
| Reported fruit & vegetable consumption                                                        | -1.09698<br>-0.10037               | -1.0                     | 0.26803<br>0.02452                    | -1.2                    |
| <b>Income</b>                                                                                 | -1.06915<br>-0.09783               | 1.6                      | <b>0.23041</b><br><b>0.02108</b>      | <b>-15.0</b>            |
| Smoking status                                                                                | -1.05337<br>-0.09638               | 3.0                      | 0.28741<br>0.02630                    | 6.0                     |
| Socioeconomic status                                                                          | -1.15279<br>-0.10548               | -6.1                     | 0.26994<br>0.02470                    | -0.5                    |
| <b>Any prescribed medication</b>                                                              | <b>-0.97137</b><br><b>-0.08888</b> | <b>10.6</b>              | 0.25601<br>0.02343                    | -5.6                    |

|                                           |                      |      |                    |      |
|-------------------------------------------|----------------------|------|--------------------|------|
| Sedentary time                            | -1.18817<br>-0.10872 | -9.4 | 0.27013<br>0.02472 | -0.4 |
| Light-intensity physical activity<br>time | -1.11946<br>-0.10243 | -3.1 | 0.27152<br>0.02484 | 0.1  |

All analyses controlled for primary sampling units, clustering and survey weights. Confounders were considered for inclusion as follows: primarily using all the available data, in separate models for MVPA and BMI with glycated haemoglobin (HbA1c) as the dependent variable, confounders were included based on a criteria of changing the regression coefficient for either MVPA or BMI by 10% or more once added individually to a basic model adjusted for age, ethnicity, sex, and accelerometer wear-time. **Bold** indicates a  $\geq 10\%$  change in the regression coefficient for either MVPA or BMI.

† Beta coefficients represent the average difference in HbA1c (mmol/mol) (%) for each 30 minutes/day increment in MVPA

‡ Beta coefficients represent the average difference in HbA1c (mmol/mol) (%) for each 1 kg/m<sup>2</sup> increment in BMI

Table S2 - Sample of adults with valid accelerometer data: comparison of the basic characteristics between the included and excluded participants

| Characteristic                                                                                                | Included (N = 1,109) | Excluded (N = 1,022) | p-value |
|---------------------------------------------------------------------------------------------------------------|----------------------|----------------------|---------|
| Age (in years) †                                                                                              | 51.0 (16.5)          | 50.6 (18.8)          | 0.601   |
| Body Mass Index (kg/m <sup>2</sup> ) †                                                                        | 27.3 (4.8)           | 27.7 (5.4)           | 0.085   |
| Missing                                                                                                       | 0 (0.0)              | 185 (18.1)           |         |
| Waist Circumference (cm) †                                                                                    | 92.9 (13.9)          | 94.0 (15.0)          | 0.100   |
| Missing                                                                                                       | 0 (0.0)              | 229 (22.4)           |         |
| Ethnicity ‡                                                                                                   |                      |                      | 0.063   |
| White                                                                                                         | 1,055 (94.2)         | 953 (92.1)           |         |
| Non-White                                                                                                     | 54 (5.8)             | 69 (7.9)             |         |
| Sex ‡                                                                                                         |                      |                      | 0.278   |
| Men                                                                                                           | 523 (50.2)           | 458 (48.3)           |         |
| Women                                                                                                         | 586 (49.8)           | 564 (51.7)           |         |
| Total Accumulated Moderate-to-Vigorous-Intensity Physical Activity Time †<br>(no. of minutes/valid day)       | 30.8 (25.8)          | 29.7 (24.9)          | 0.318   |
| Moderate-to-Vigorous-Intensity Physical Activity Time in Bouts of ≥10 Minutes †<br>(no. of minutes/valid day) | 10.8 (16.2)          | 10.0 (14.6)          | 0.233   |

All analyses controlled for primary sampling units, clustering and survey weights.

† Continuous variable; Mean (Standard Deviation); p-value based on unpaired t-test

‡ Categorical variable; n (Proportion (%)); p-value based on chi-squared test

---

**Bold** indicates statistical significance at  $p < 0.05$

---



Table S3 - Sensitivity analyses: adjusted linear regression models showing the associations between continuous measures of total accumulated moderate-to-vigorous-intensity physical activity (MVPA) time and waist circumference with glycated haemoglobin (HbA1c)

| Adjusted linear regression model | HbA1c (dual units) | MVPA (30 minutes/day)                                   |                  | Waist Circumference (1 cm)                        |                  |
|----------------------------------|--------------------|---------------------------------------------------------|------------------|---------------------------------------------------|------------------|
|                                  |                    | Beta (99% CI) †                                         | p-value          | Beta (99% CI) ‡                                   | p-value          |
| Model 1                          | [mmol/mol]<br>[%]  | <b>-0.9 (-1.4, -0.4)</b><br><b>-0.08 (-0.13, -0.03)</b> | <b>&lt;0.001</b> | <b>0.1 (0.1, 0.1)</b><br><b>0.01 (0.01, 0.01)</b> | <b>&lt;0.001</b> |
| Model 2                          | [mmol/mol]<br>[%]  | <b>-0.6 (-1.0, -0.1)</b><br><b>-0.05 (-0.10, -0.01)</b> | <b>0.003</b>     | <b>0.1 (0.1, 0.1)</b><br><b>0.01 (0.01, 0.01)</b> | <b>&lt;0.001</b> |

All analyses controlled for primary sampling units, clustering and survey weights. **Bold** indicates statistical significance at  $p < 0.01$ . Model 1 adjusted for: age, ethnicity, income, sex, any prescribed medication, and accelerometer wear-time. Model 2 additionally adjusted for waist circumference (for MVPA analysis) and MVPA (for waist circumference analysis).

† Beta coefficients represent the average difference in HbA1c (mmol/mol) (%) for each 30 minutes/day increment in MVPA

‡ Beta coefficients represent the average difference in HbA1c (mmol/mol) (%) for each 1 cm increment in waist circumference

*Table S4 - Sensitivity analyses: interaction analysis: adjusted linear regression models showing the associations between continuous measures of total accumulated moderate-to-vigorous-intensity physical activity (MVPA) time and waist circumference with glycated haemoglobin (HbA1c) stratified by MVPA and waist circumference levels*

| P-value of MVPA x Waist Circumference interaction term | Stratification           | HbA1c (dual units) | MVPA (30 minutes/day)                                   |                  | Waist Circumference (1 cm)                        |                  |
|--------------------------------------------------------|--------------------------|--------------------|---------------------------------------------------------|------------------|---------------------------------------------------|------------------|
|                                                        |                          |                    | Beta (99% CI) †                                         | p-value          | Beta (99% CI) ‡                                   | p-value          |
| <0.001                                                 | Low Waist Circumference  | [mmol/mol]<br>[%]  | -0.3 (-0.7, 0.0)<br>-0.03 (-0.06, 0.00)                 | 0.024            | -                                                 | -                |
|                                                        | High Waist Circumference | [mmol/mol]<br>[%]  | <b>-1.8 (-3.0, -0.5)</b><br><b>-0.16 (-0.28, -0.05)</b> | <b>&lt;0.001</b> | -                                                 | -                |
|                                                        | MVPA <150 mins/week      | [mmol/mol]<br>[%]  | -                                                       | -                | <b>0.1 (0.1, 0.2)</b><br><b>0.01 (0.01, 0.02)</b> | <b>&lt;0.001</b> |
|                                                        | MVPA ≥150 mins/week      | [mmol/mol]<br>[%]  | -                                                       | -                | <b>0.1 (0.0, 1)</b><br><b>0.01 (0.00, 0.01)</b>   | <b>&lt;0.001</b> |

All analyses controlled for primary sampling units, clustering and survey weights. 'High Waist Circumference' was defined as having a waist circumference of ≥102 cm for men and ≥88 cm for women. **Bold** indicates statistical significance at p<0.01. Models adjusted for: age, ethnicity, income, sex, any prescribed medication, and accelerometer wear-time.

† Beta coefficients represent the average difference in HbA1c (mmol/mol) (%) for each 30 minutes/day increment in MVPA

‡ Beta coefficients represent the average difference in HbA1c (mmol/mol) (%) for each 1 cm increment in waist circumference

*Table S5 - Sensitivity analyses: weighted mutually exclusive category prevalence*

| Weighted Prevalence [%] |                                 |                             |                                   |                               |
|-------------------------|---------------------------------|-----------------------------|-----------------------------------|-------------------------------|
| Method                  | 'Physically active & non-obese' | 'Physically active & obese' | 'Physically inactive & non-obese' | 'Physically inactive & obese' |
| Reference               | 45.9%                           | 10.7%                       | 29.9%                             | 13.5%                         |
| 1                       | 37.8%                           | 19.0%                       | 20.0%                             | 23.2%                         |
| 2                       | 36.1%                           | 20.5%                       | 20.7%                             | 22.7%                         |
| 3                       | 14.3%                           | 1.8%                        | 61.5%                             | 22.4%                         |

*All analyses controlled for primary sampling units, clustering and survey weights.*

*Reference Method = Mutually exclusive categories derived and utilised in the main analysis*

*Method 1 = 'Obese' was defined as having a waist circumference of  $\geq 102$  cm for men and  $\geq 88$  cm for women*

*Method 2 = 'Obese' was defined as having a body mass index of  $\geq 27.5$  kg/m<sup>2</sup>*

*Method 3 = Participants were only classified into the 'physically active' categories if they accumulated  $\geq 150$  minutes/week of MVPA in bouts of  $\geq 10$  minutes*

Table S6 - Sensitivity analyses: adjusted linear regression models showing the associations between mutually exclusive categories of moderate-to-vigorous-intensity physical activity (MVPA) time and obesity status with glycated haemoglobin (HbA1c)

| Method    | HbA1c<br>(dual units) | 'Physically active & non-obese'                         |                  | 'Physically active & obese'                             |              | 'Physically inactive & non-obese'                       |                  | 'Physically inactive & obese' |
|-----------|-----------------------|---------------------------------------------------------|------------------|---------------------------------------------------------|--------------|---------------------------------------------------------|------------------|-------------------------------|
|           |                       | Beta (99% CI) †                                         | p-value          | Beta (99% CI) †                                         | p-value      | Beta (99% CI) †                                         | p-value          |                               |
| Reference | [mmol/mol]<br>[%]     | <b>-3.5 (-5.2, -1.9)</b><br><b>-0.32 (-0.47, -0.18)</b> | <b>&lt;0.001</b> | <b>-2.1 (-4.1, -0.2)</b><br><b>-0.19 (-0.37, -0.02)</b> | <b>0.005</b> | -1.9 (-3.8, 0.0)<br>-0.17 (-0.35, 0.00)                 | 0.012            | Reference                     |
| 1         | [mmol/mol]<br>[%]     | <b>-4.1 (-5.9, -2.2)</b><br><b>-0.37 (-0.54, -0.21)</b> | <b>&lt;0.001</b> | <b>-2.5 (-4.4, -0.6)</b><br><b>-0.23 (-0.40, -0.05)</b> | <b>0.001</b> | <b>-3.1 (-5.0, -1.2)</b><br><b>-0.29 (-0.46, -0.11)</b> | <b>&lt;0.001</b> | Reference                     |
| 2         | [mmol/mol]<br>[%]     | <b>-2.9 (-4.1, -1.7)</b><br><b>-0.27 (-0.38, -0.16)</b> | <b>&lt;0.001</b> | <b>-1.5 (-2.9, -0.2)</b><br><b>-0.14 (-0.27, -0.02)</b> | <b>0.004</b> | -0.9 (-2.9, 1.1)<br>-0.08 (-0.27, 0.01)                 | 0.229            | Reference                     |
| 3         | [mmol/mol]<br>[%]     | <b>-3.4 (-4.7, -2.1)</b><br><b>-0.31 (-0.43, -0.20)</b> | <b>&lt;0.001</b> | -2.0 (-4.3, 0.3)<br>-0.18 (-0.39, 0.03)                 | 0.027        | <b>-1.7 (-3.0, -0.4)</b><br><b>-0.16 (-0.28, -0.04)</b> | <b>0.001</b>     | Reference                     |

All analyses controlled for primary sampling units, clustering and survey weights.

Reference Method = Mutually exclusive categories derived and utilised in the main analysis

Method 1 = 'Obese' was defined as having a waist circumference of  $\geq 102$  cm for men and  $\geq 88$  cm for women

Method 2 = 'Obese' was defined as having a body mass index of  $\geq 27.5$  kg/m<sup>2</sup>

Method 3 = Participants were only classified into the 'physically active' categories if they accumulated  $\geq 150$  minutes/week of MVPA in bouts of  $\geq 10$  minutes

**Bold** indicates statistical significance at  $p < 0.01$ . Models adjusted for: age, ethnicity, income, sex, any prescribed medication, and accelerometer wear-time.

† Beta coefficients represent the average difference in HbA1c (mmol/mol) (%) in comparison to the 'physically inactive and obese' category
